# Supplementary material for: Designing Cu–CoO heterostructure nanosheets for efficient electrooxidation of 5-hydroxymethylfurfural to 2,5-furandicarboxylic acid
Source: Royal Society of Chemistry journal article supplement (doi:10.1039/d4cc04970e), 2024-11-28
Supplement: d4cc04970e1.pdf [file d4cc04970e1.pdf]

## Electronic Supplementary Information (ESI)

### Designing Cu-CoO heterostructure nanosheets for efficient electrooxidation of 5-hydroxymethylfurfural to 2,5-furandicarboxylic acid

Dongfang Ji,<sup>a</sup> Wenke Wang,<sup>a</sup> Ting Sang,<sup>a</sup> Jingcheng Hao,<sup>a</sup> Xiaoyu Zhang,<sup>\*b</sup> and  
Zhonghao Li<sup>\*a</sup>

<sup>a</sup> Key Laboratory of Colloid and Interface Chemistry, Ministry of Education, Shandong University, Jinan, 250100, China, E-mail: zhonghaoli@sdu.edu.cn

<sup>b</sup> Zhejiang Carbon Neutral Innovation Institute & Moganshan Institute of ZJUT at Deqing, Zhejiang University of Technology, Hangzhou 310014, China, E-mail: zhangxiaoyu@zjut.edu.cn

## **Experimental Section**

### **Materials and chemicals**

Choline chloride (ChCl), oxalic acid ( $\text{H}_2\text{C}_2\text{O}_4$ ), potassium chloride (KCl) and copper acetylacetonate ( $\text{C}_{10}\text{H}_{14}\text{CuO}_4$ ) were all obtained from Aladdin Chemistry Co., Ltd. Potassium hydroxide (KOH), Cobalt chloride hexahydrate ( $\text{CoCl}_2 \cdot 6\text{H}_2\text{O}$ ) were purchased from Sinopharm Chemical Reagent Co., Ltd. 5-hydroxymethylfurfural (HMF), 2,5-furandicarboxylic acid (FDCA), 5-formyl furan-2-carboxylic acid (FFCA) and 5-hydroxymethyl-2-furan-carboxylic acid (HMFCFA) were purchased from Alfa-Aesar. 2,5-diformyl furan (DFF) was purchased from Tokyo Chemical Industry Co., Ltd. 5 wt% nafion solution was purchased from the Sigma Co., Ltd. Carbon cloth was obtained from Changsha Lyrun Material Co., Ltd. Nafion 115 membrane was purchased from Wuhan GaossUnion technology Co., Ltd.

### **Synthesis of choline chloride/oxalic acid (ChCl/OA) DES**

The deep eutectic solvent (DES) was synthesized according to the procedures specified in the existing literature.<sup>1</sup> To obtain the DES, equimolar amount of choline chloride (ChCl) and oxalic acid (OA) was mixed and magnetically stirred at 80 °C for 30 minutes.

### **Synthesis of Cu-CoO heterostructure nanosheets**

The Cu-CoO products with varying initial Cu and Co ratios are labeled as Cu-CoO (x:y), where x:y represents the Cu/Co atomic ratio of the initial feed. To synthesize the Cu-CoO (1:3) product, the Cu/Co-based precursor was first prepared using a microwave-assisted DES approach. In a typical procedure, 21.5 mg  $\text{C}_{10}\text{H}_{14}\text{CuO}_4$  and

58.5 mg  $\text{CoCl}_2 \cdot 6\text{H}_2\text{O}$  were dissolved in 1 mL  $\text{ChCl/OA DES}$ . This mixture was then subjected to ultrasonication at 60 °C until a well-dispersed pink solution was obtained. The precursor was generated by heating the above mixture under microwave for 10 s at 100 W. For comparison, we also synthesize the precursors by microwave heating for 15 and 20 s. The precursors were then gathered, repeatedly washed with ethanol, and dried in the vacuum at room temperature for 6 hours.

Subsequently, the dried precursors were placed in a quartz tube inside a tube furnace and heat-treated at 400 °C for 2 hours with a ramp rate of 10 °C  $\text{min}^{-1}$  in a nitrogen atmosphere to yield Cu-CoO nanosheets. Finally, the product was rinsed with water and ethanol before being dried in the vacuum drying oven.

For comparison, Cu-CoO (1:2) and Cu-CoO (1:4) products were also fabricated according to the above procedures. To synthesize Cu-CoO (1:2), 28.4 mg of  $\text{C}_{10}\text{H}_{14}\text{CuO}_4$  and 51.6 mg of  $\text{CoCl}_2 \cdot 6\text{H}_2\text{O}$  were employed, whereas for Cu-CoO (1:4), 17.3 mg of  $\text{C}_{10}\text{H}_{14}\text{CuO}_4$  and 62.7 mg of  $\text{CoCl}_2 \cdot 6\text{H}_2\text{O}$  were used. Moreover, CoO product was also synthesized with  $\text{CoCl}_2 \cdot 6\text{H}_2\text{O}$ .

### **Characterizations**

The X-ray diffraction (XRD) patterns were obtained using the Rigaku SmartLab 9KW X-ray diffractometer. Transmission electron microscopy (TEM) was performed on a JEM1400 microscope. Scanning electron microscopy (SEM) and energy-dispersive X-ray (EDX) characterization were conducted with the Zeiss Sigma 300 instrument. High resolution transmission electron microscopy (HRTEM) images were acquired using the JEM-2100 microscope. High-angle annular dark field (HAADF)-

scanning transmission electron microscopy (STEM) and energy-dispersive X-ray (EDX) were tested on the FEI Titan G2 60-300. X-ray photoelectron spectroscopy (XPS) measurements were performed by a Thermo Fisher ESCALAB XI. High performance liquid chromatography (HPLC) analysis was performed using an Agilent G7114A system.

### **Electrochemical measurements**

The electrochemical tests were conducted using a CHI760E workstation. All electrochemical measurements employed the three-electrode system, which comprised a catalyst-loaded carbon paper as the working electrode, platinum foil as the counter electrode and saturated Ag/AgCl as the reference electrode. The electrolyte used was 1.0 M KOH solution (10 mL), either with or without 10 mM HMF.

To obtain the catalyst ink, 4 mg of the as-prepared catalyst was combined with Nafion solution (5 wt%, 20  $\mu$ L), ethanol (140  $\mu$ L) and deionized water (80  $\mu$ L). The mixture was subsequently sonicated for 15 minutes to obtain a homogenous suspension. Subsequently, the resulting suspension was casted on a carbon paper ( $1 \times 1 \text{ cm}^2$ ) to act as the working electrode (loading of  $4 \text{ mg cm}^{-2}$ ).

The linear scanning voltammetry (LSV) was performed at  $10 \text{ mV s}^{-1}$ . The electrochemical double-layer capacitance (Cdl) was measured utilizing cyclic voltammetry (CV). Electrochemical impedance spectroscopy (EIS) characterization was conducted ranging from 1 Hz to 100 kHz.

All potentials in this experiment were referenced to the reversible hydrogen electrode (RHE) using the following formula:

$$E \text{ (RHE)} = E \text{ (Ag/AgCl)} + 0.197 + 0.059 \times \text{pH} \quad (1)$$

### Products analysis

The concentration of different compounds in the electrolysis were monitored by high-performance liquid chromatography (HPLC). During chronoamperometry at 1.45 V, a volume of 10  $\mu\text{L}$  electrolyte was extracted during chronoamperometry, diluted with water to 500  $\mu\text{L}$ , and then analyzed through HPLC. Methanol (30% volume) with ammonium formate (70% volume) aqueous solution (5 mM) was used as the eluent for separation and quantification.

HMF conversion, FDCA yield, and Faraday efficiency (FE) were determined based on the following equations.

$$\text{HMF conversion (\%)} = [n \text{ (HMF consumed)} / n \text{ (HMF initial)}] \times 100 \quad (2)$$

$$\text{FDCA yield (\%)} = [n \text{ (FDCA formed)} / n \text{ (HMF initial)}] \times 100 \quad (3)$$

$$\text{Faradaic efficiency (\%)} = [n \text{ (FDCA formed)} / (Q / (6 \times F))] \times 100 \quad (4)$$

wherein Q is the total transferred charge, F is Faraday constant ( $96485 \text{ C mol}^{-1}$ ) and n is the mole number of reactant.

### Density functional theory (DFT) Calculation

All DFT calculations were carried out with the Vienna Ab-initio Simulation Package (VASP).<sup>2,3</sup> The exchange-correlation effects were treated using the Perdew-Burke-Ernzerhof (PBE) functional within the framework of the generalized gradient approximation (GGA).<sup>4,5</sup> The core-valence interactions were addressed using the projected augmented wave (PAW) method.<sup>6</sup> Plane wave expansions were truncated at an energy cutoff of 400 eV. Structural optimization was performed with convergence

criteria set at  $1.0 \times 10^{-4}$  eV for energy and  $0.05$  eV  $\text{\AA}^{-1}$  for forces. The Brillouin zone was sampled with the  $3 \times 3 \times 1$  K-point grid. Dispersion interactions were accounted for using Grimme's DFT-D3 methodology.<sup>7</sup>

The adsorption energy ( $E_{\text{ads}}$ ) between the HMF and the CoO or Cu-CoO is calculated by the following equation:

$$E_{\text{ads}} = E^*_{\text{HMF}} - E_{\text{HMF}} - E_{\text{sub}} \quad (5)$$

where  $E_{\text{HMF}}$  and  $E^*_{\text{HMF}}$  denote the energies before and after the adsorption of HMF on the substrates, respectively.  $E_{\text{sub}}$  represents the energy of CoO and CoO-Cu surfaces.

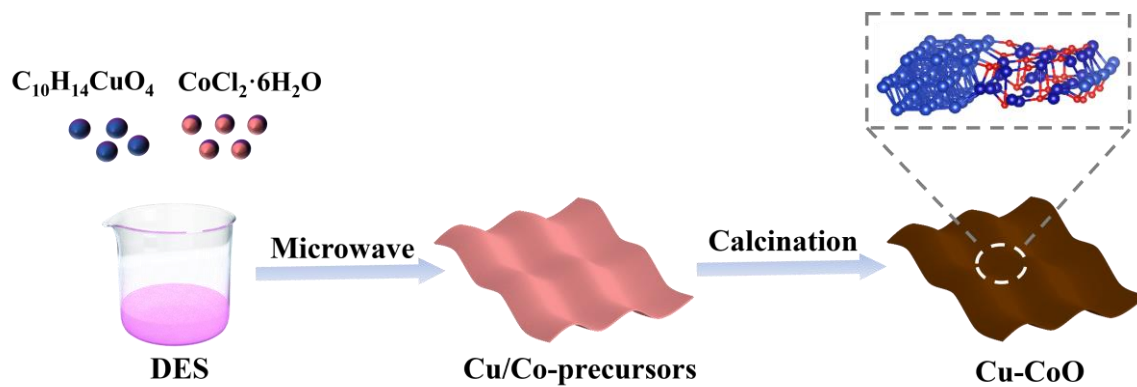

**Fig. S1** Schematic diagram of Cu-CoO heterostructure nanosheet synthesis.

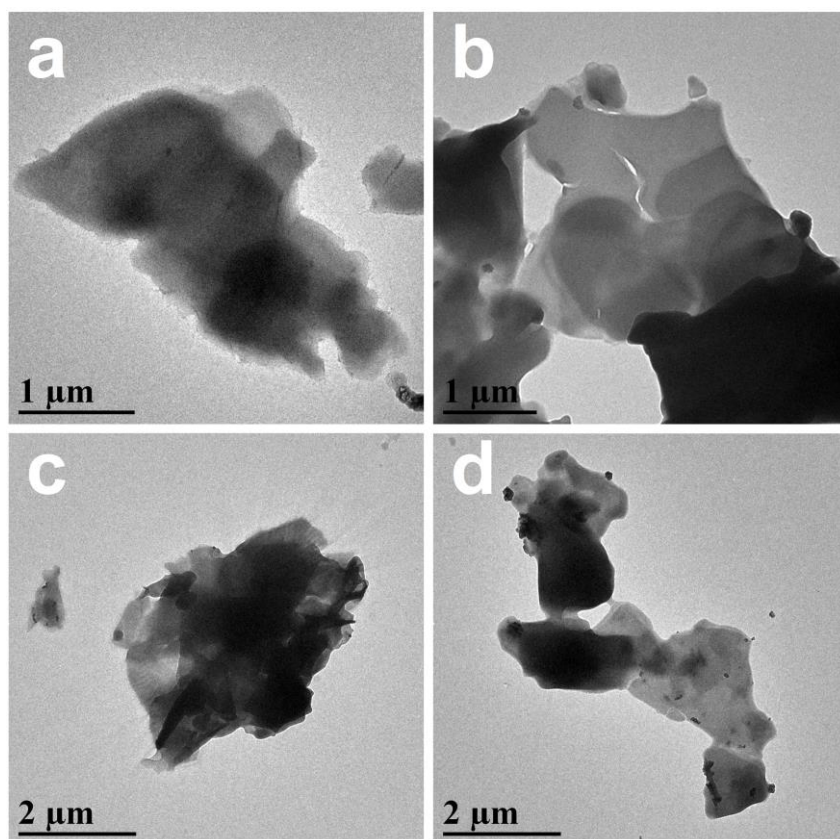

**Fig. S2** TEM images of the precursors obtained after microwave heating 1 mL ChCl/OA DES with the presence of  $C_{10}H_{14}CuO_4$  and  $CoCl_2 \cdot 6H_2O$ . (a) Co precursor synthesized with 80 mg  $CoCl_2 \cdot 6H_2O$ , (b) Cu/Co precursor obtained with the initial mole ratio of Cu/Co=1:2 (51.6 mg  $CoCl_2 \cdot 6H_2O$  and 28.4 mg  $C_{10}H_{14}CuO_4$ ), (c) Cu/Co precursor obtained with the initial mole ratio of Cu/Co=1:3 (58.5 mg  $CoCl_2 \cdot 6H_2O$  and 21.5 mg  $C_{10}H_{14}CuO_4$ ), (d) Cu/Co precursor obtained with the initial mole ratio of Cu/Co=1:4 (62.7 mg  $CoCl_2 \cdot 6H_2O$  and 17.3 mg  $C_{10}H_{14}CuO_4$ ). These obtained precursors will be used for synthesizing CoO, Cu-CoO (x:y).



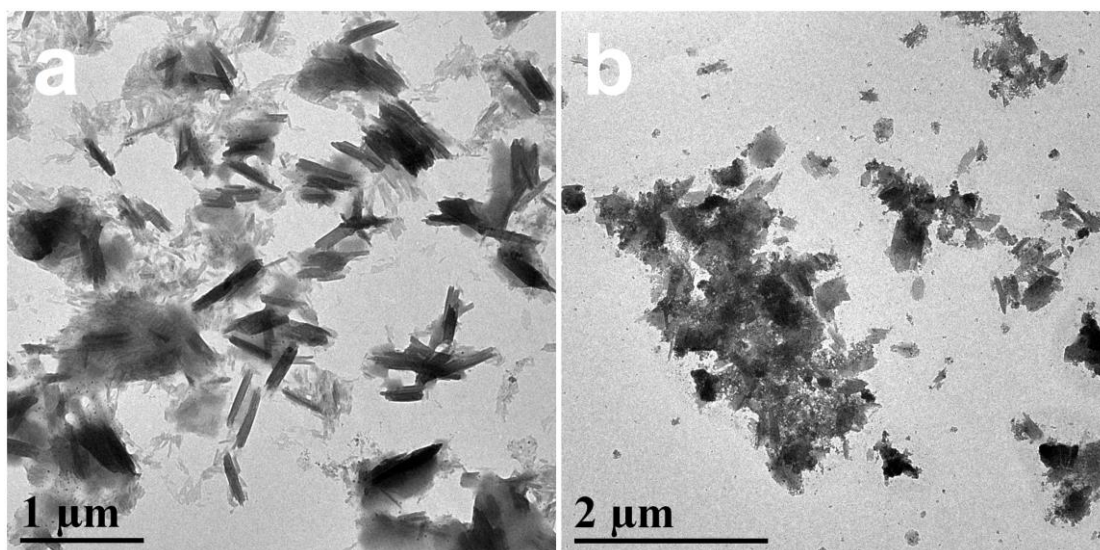

**Fig. S3** TEM images of the precursors obtained after (a) 15 s microwave heating, (b) 20 s microwave heating.

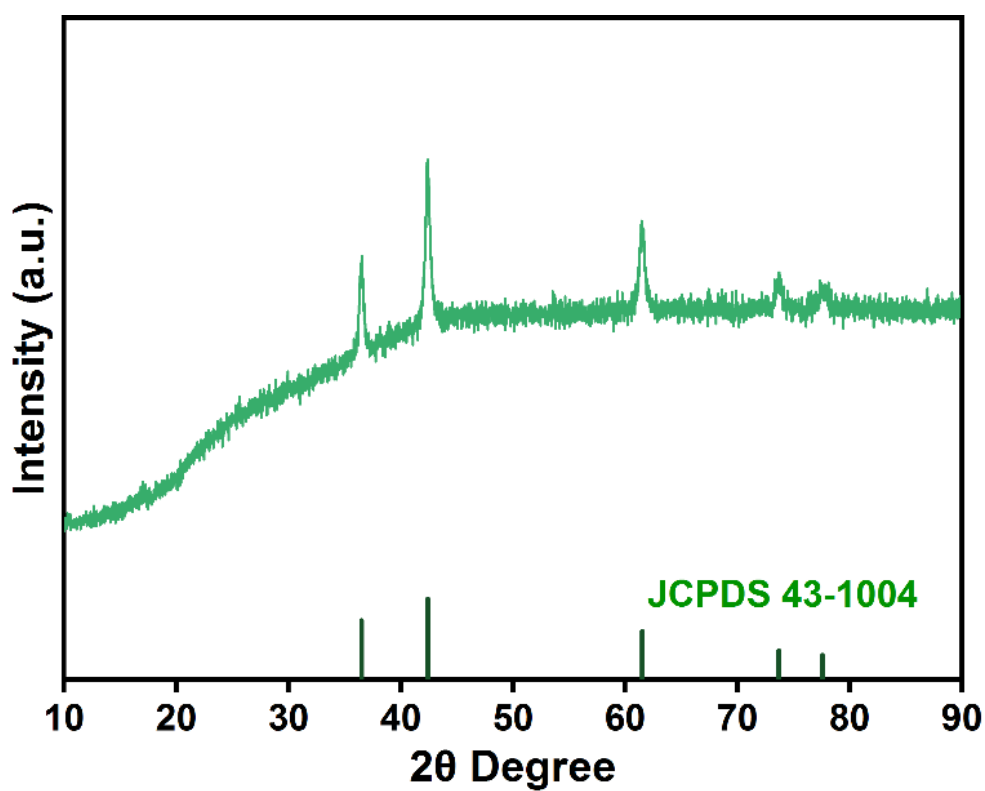

**Fig. S4** XRD pattern of the synthesized CoO.

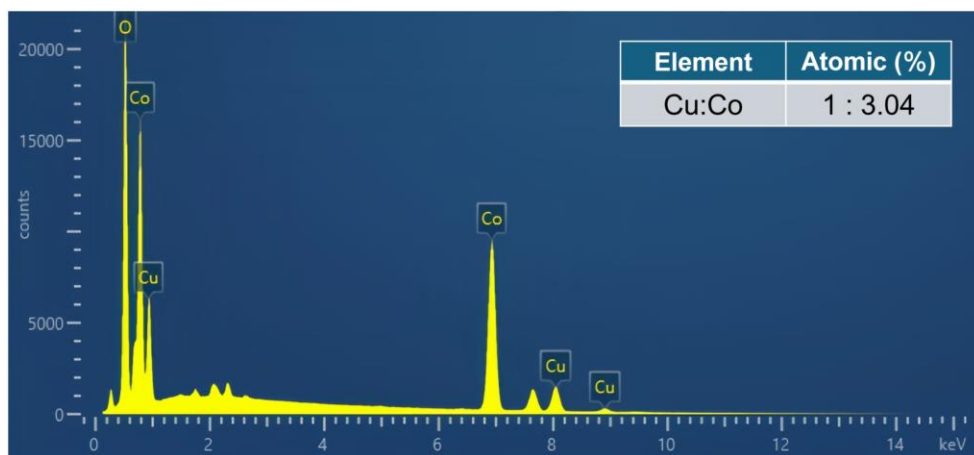

**Fig. S5** EDX spectrum of Cu-CoO (1:2) which was synthesized from the precursor obtained after microwave heating 1 mL ChCl/OA DES with 28.4 mg  $C_{10}H_{14}CuO_4$  and 51.6 mg and  $CoCl_2 \cdot 6H_2O$ .

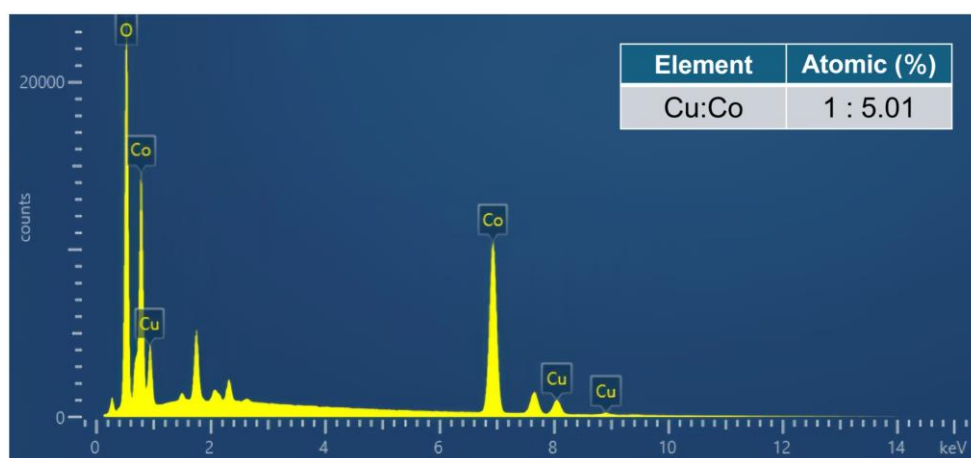

**Fig. S6** EDX spectrum of Cu-CoO (1:3) which was synthesized from the precursor obtained after microwave heating 1 mL ChCl/OA DES with 21.5 mg  $C_{10}H_{14}CuO_4$  and 58.5 mg and  $CoCl_2 \cdot 6H_2O$ .

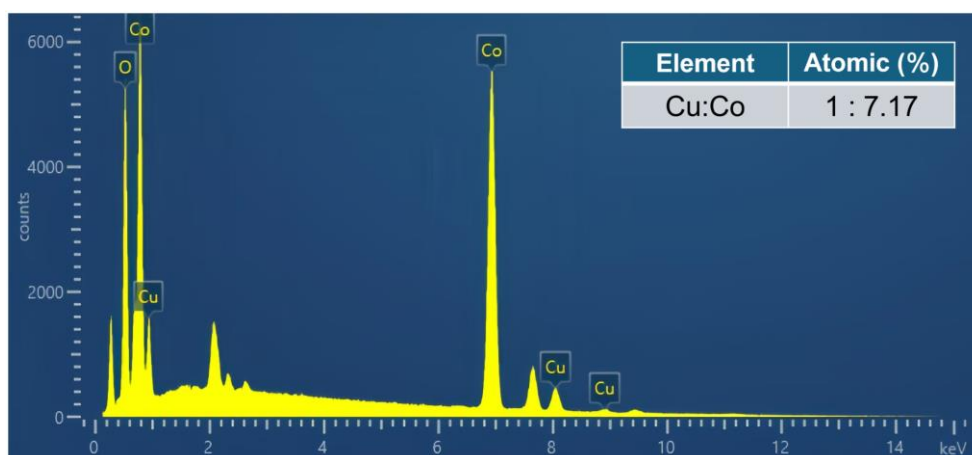

**Fig. S7** EDX spectrum of Cu-CoO (1:4) which was synthesized from the precursor obtained after microwave heating 1 mL ChCl/OA DES with 17.3 mg  $C_{10}H_{14}CuO_4$  and 62.7 mg  $CoCl_2 \cdot 6H_2O$ .

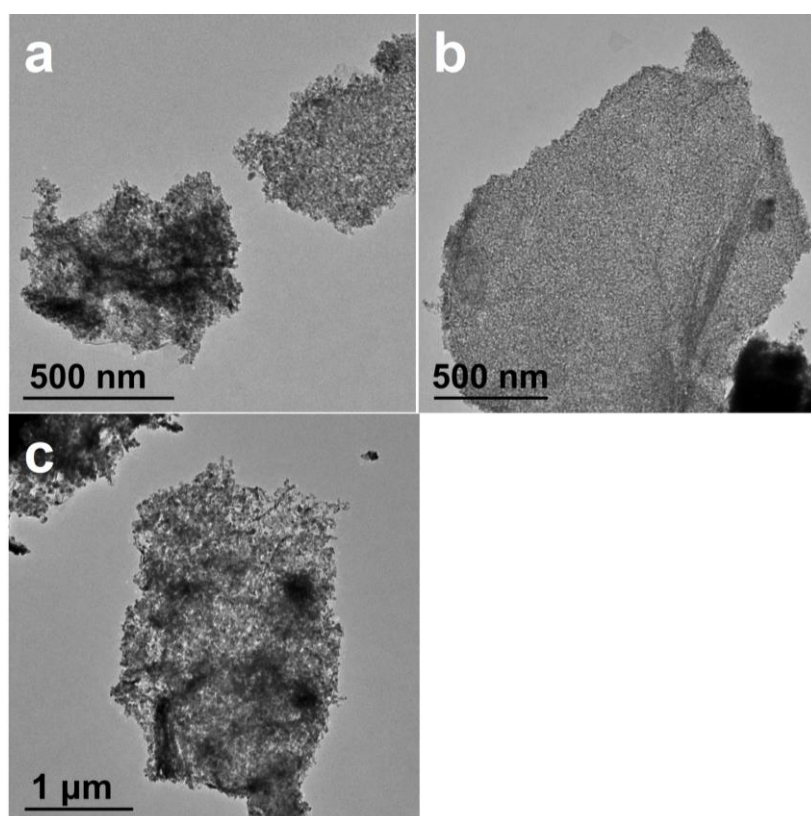

**Fig. S8** TEM images of the synthesized (a) CoO, (b) Cu-CoO (1:2), (c) Cu-CoO (1:4).

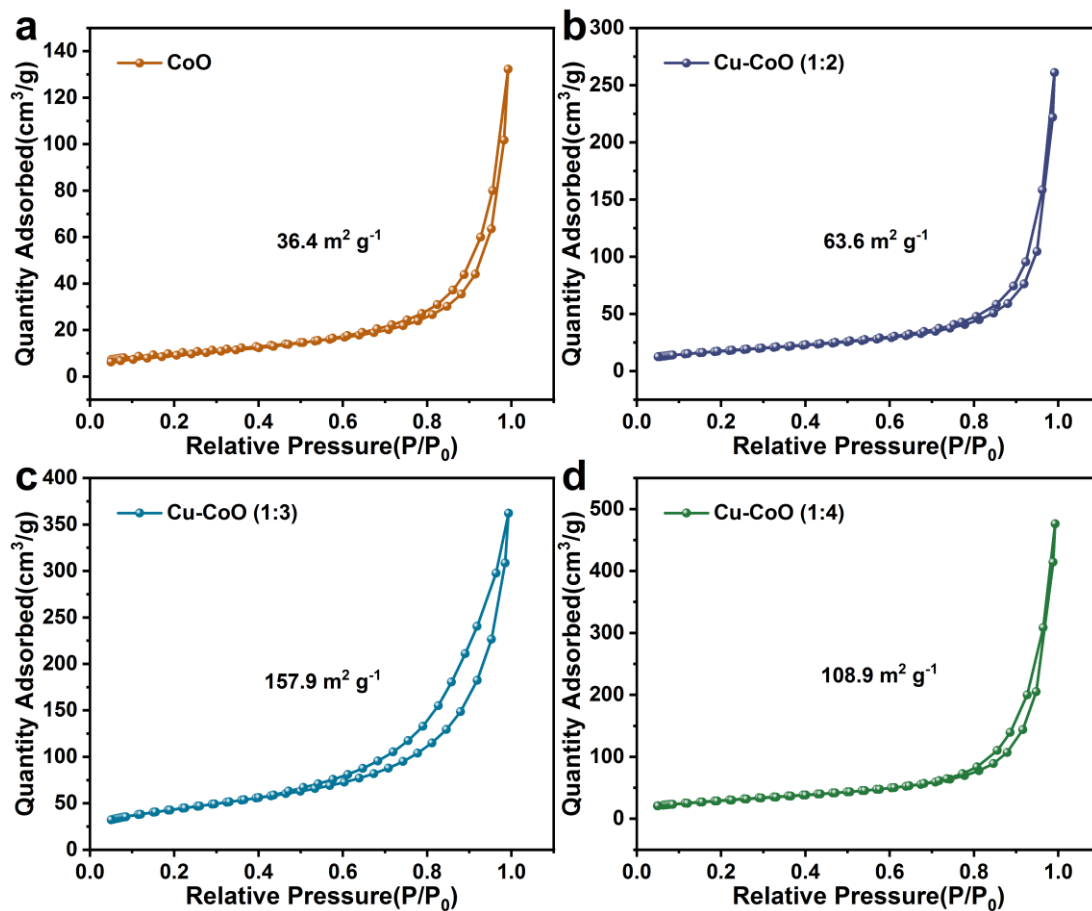

**Fig. S9** N<sub>2</sub> adsorption-desorption isotherms of (a) CoO, (b) Cu-CoO (1:2), (c) Cu-CoO (1:3), (d) Cu-CoO (1:4).

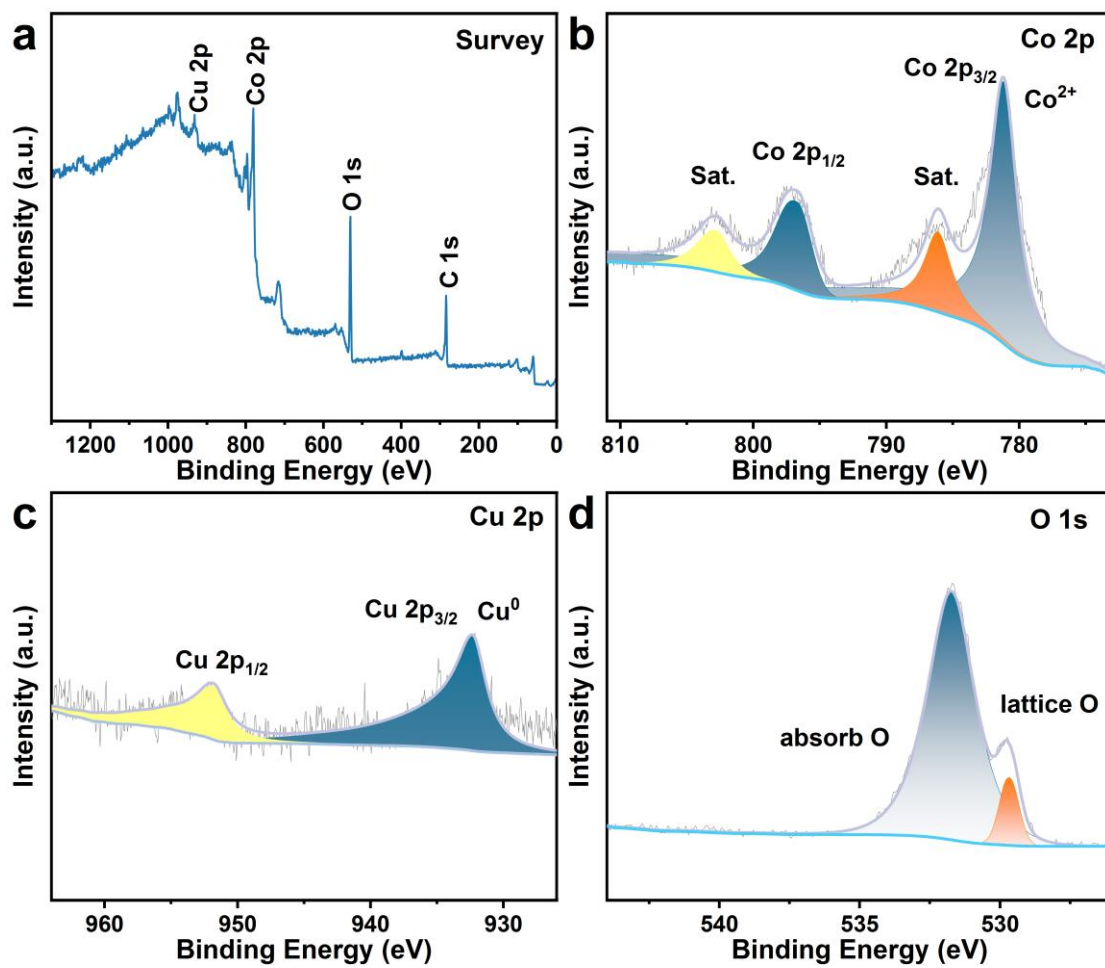

**Fig. S10** (a) XPS survey spectrum of Cu-CoO (1:3). High-resolution XPS spectra of (b) Co 2p, (c) Cu 2p, (d) O 1s for the Cu-CoO (1:3).

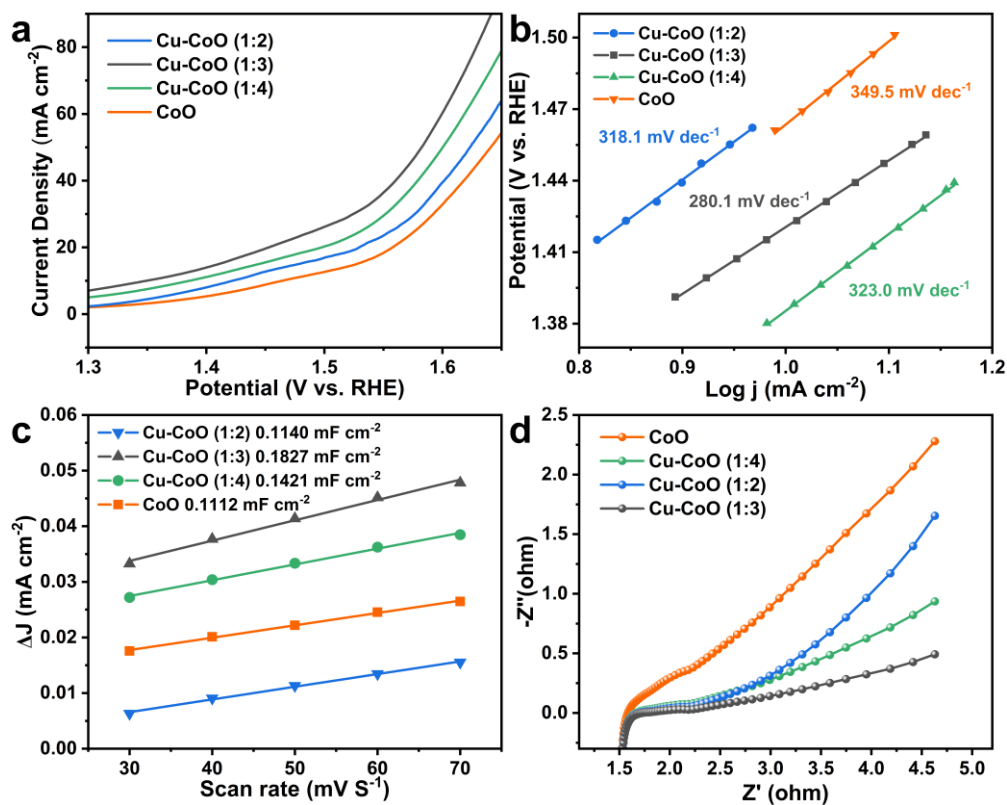

**Fig. S11** (a) LSV curves, (b) Tafel plots, (c) electrochemical double layer capacitance ( $C_{dl}$ ) of CoO, Cu-CoO (1:2), Cu-CoO (1:3) and Cu-CoO (1:4) in 1.0 M KOH solution with 10 mM HMF and (d) electrochemical impedance spectra of different catalysts at 1.45 V.

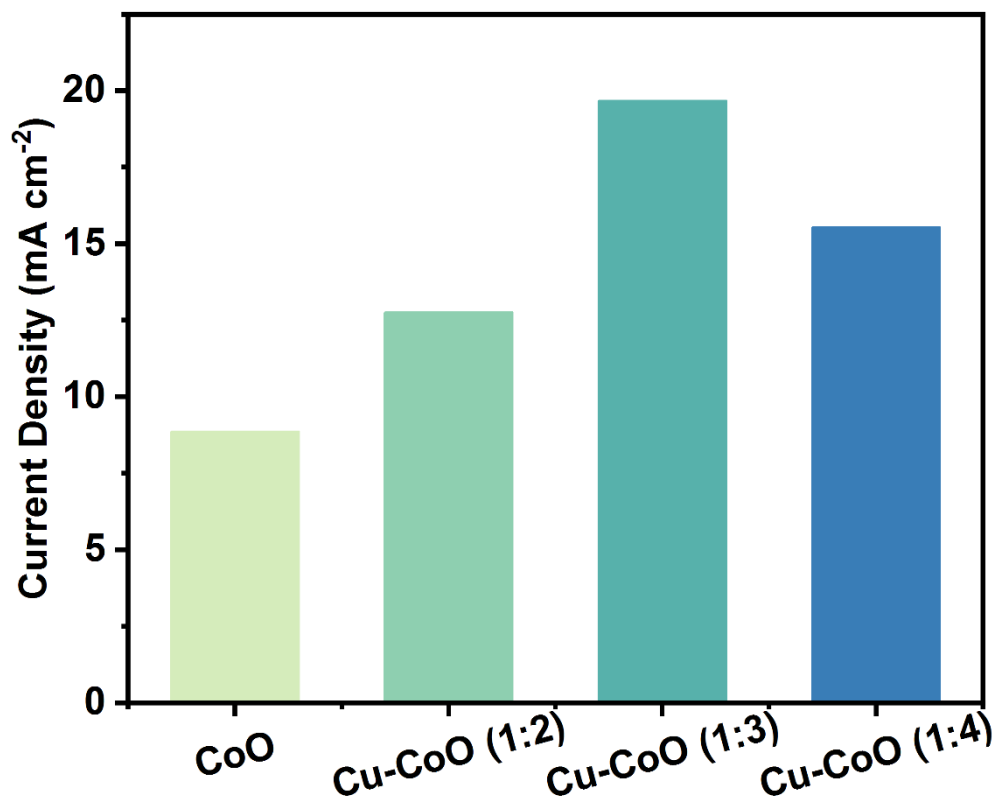

**Fig. S12** Corresponding current densities at 1.45 V in 1.0 M KOH with 10 mM HMF.

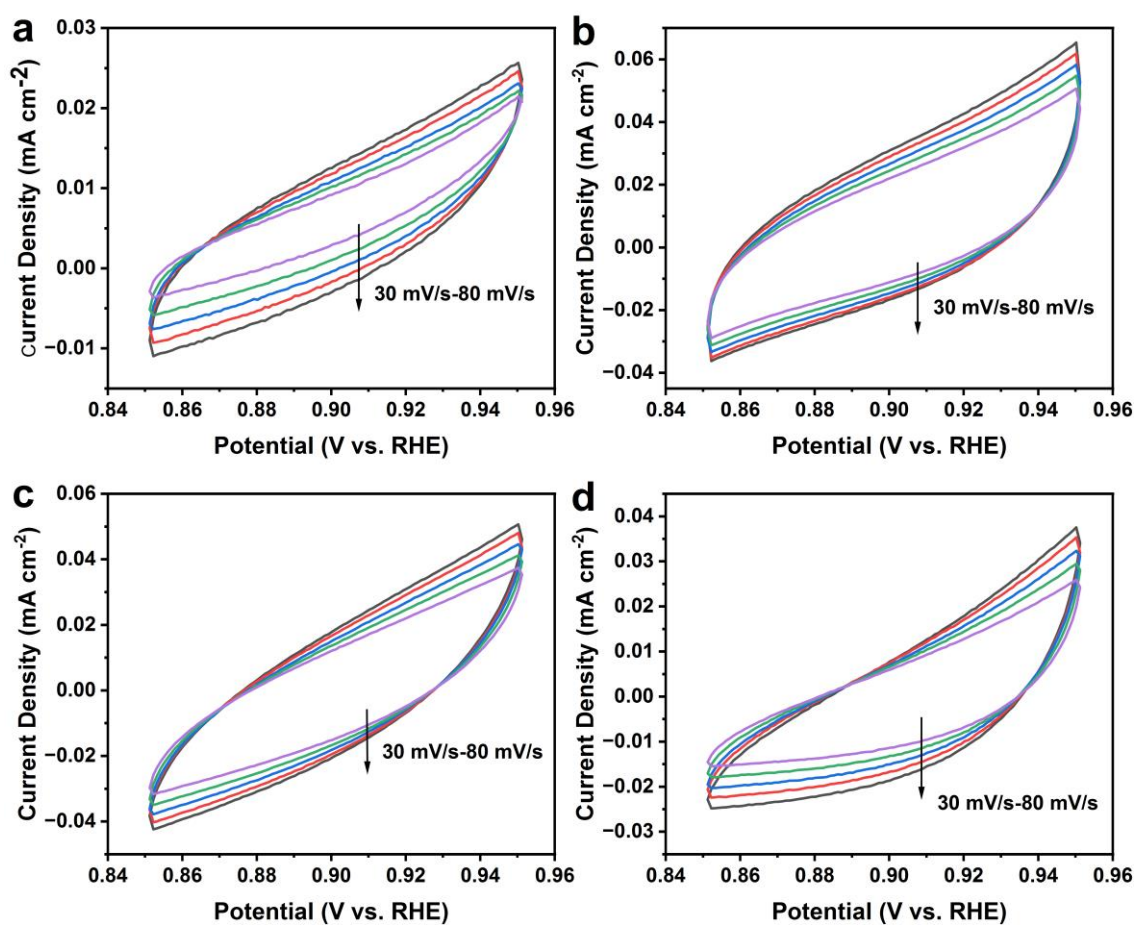

**Fig. S13** Cyclic voltammograms of (a) CoO , (b) Cu-CoO (1:2), (c) Cu-CoO (1:3), and (d) Cu-CoO (1:4) at different scan rates from 0.85 to 0.95 V vs. RHE.

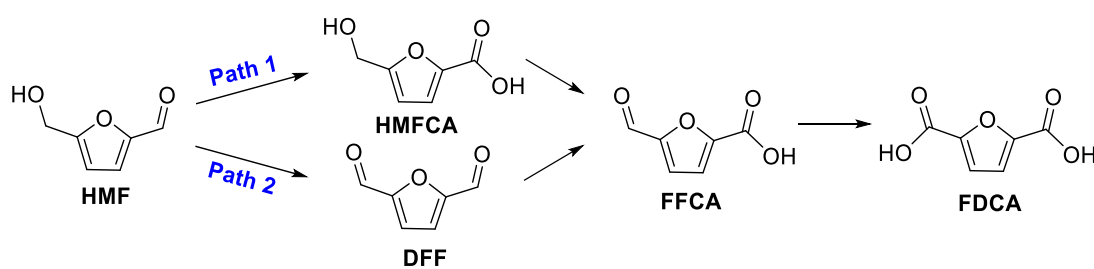

**Fig. S14** Possible pathways for the oxidation of HMF to FDCA.



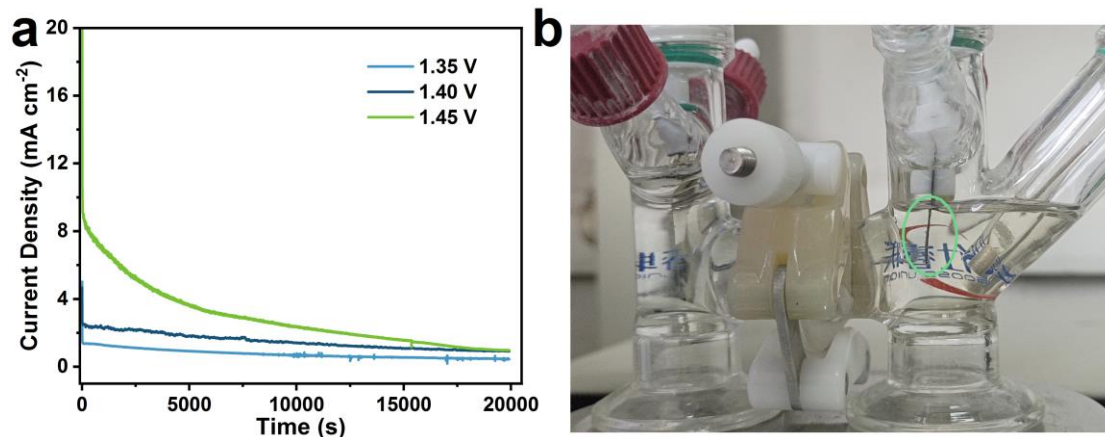

**Fig. S15** (a) Corresponding current change over time of the chronoamperometry test of Cu-CoO (1:3) at 1.35 V, 1.40 V and 1.45V, (b) the formed visible oxygen in the electrode at 1.50 V.

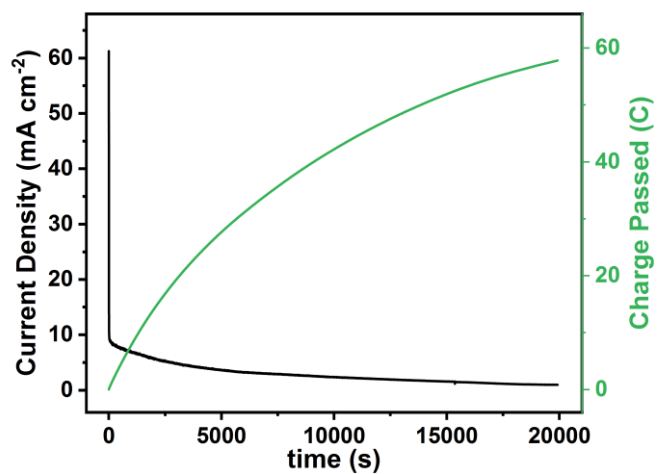

**Fig. S16** Corresponding current change and the accumulated charges over time of the chronoamperometry test of Cu-CoO (1:3) at 1.45 V in 1.0 M KOH solution with 10 mM HMF.

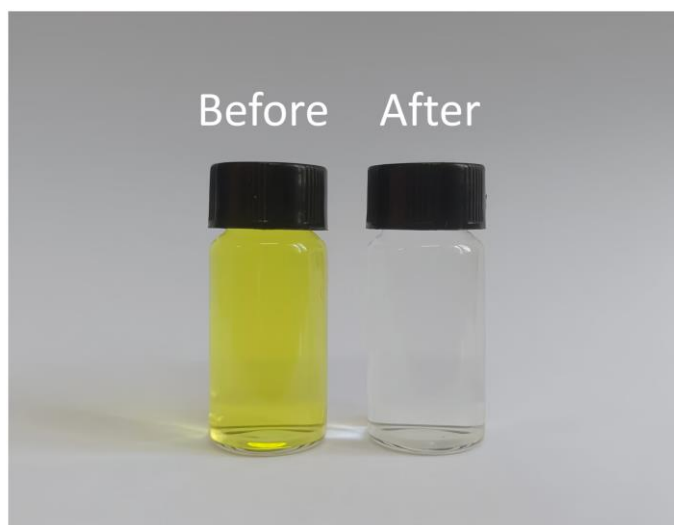

**Fig. S17** Color change of the recovered electrolyte before and after reaction.

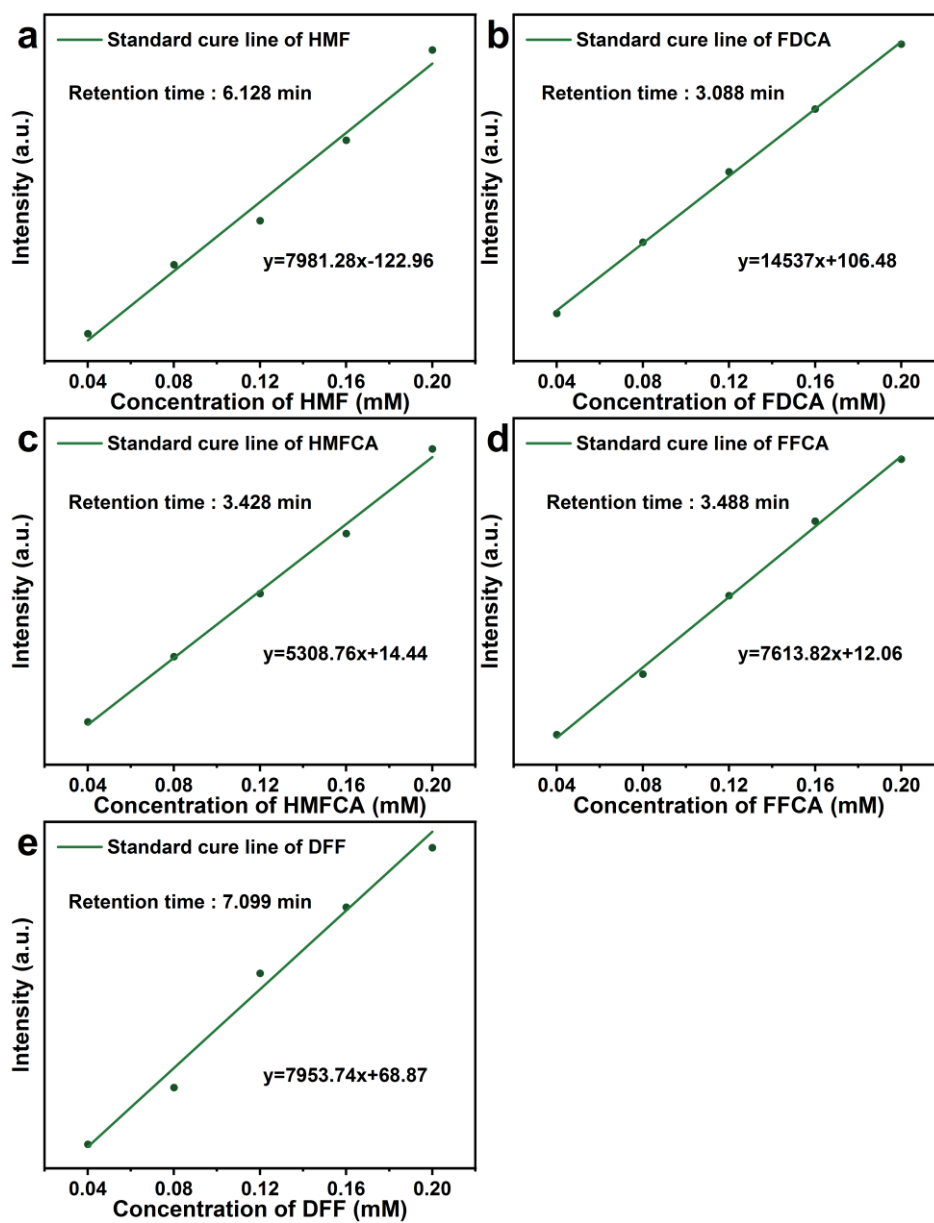

**Fig. S18** Standard curves of the HPLC for (a) HMF, (b) FDCA, (c) HMFCA, (d) FFCA and (e) DFF.

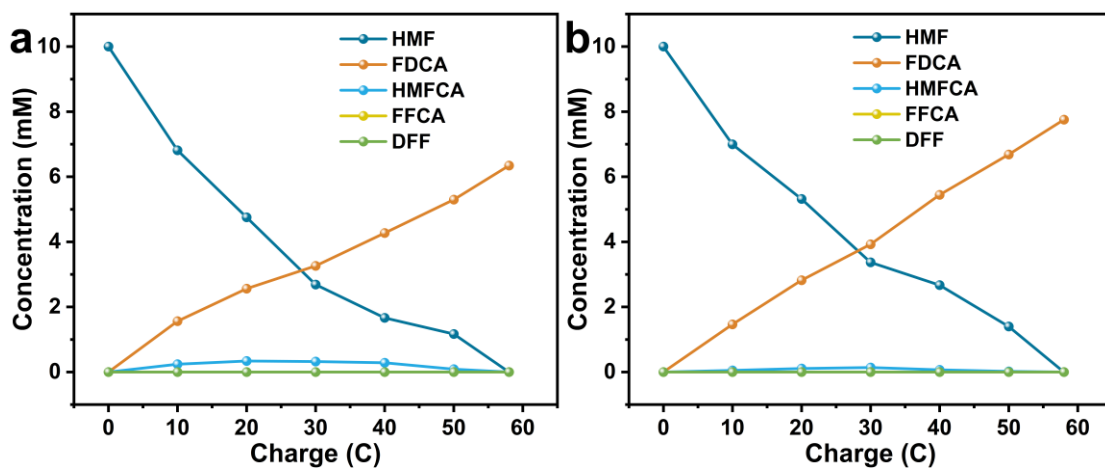

**Fig. S19** Concentration change of HMF and oxidation product during electrooxidation process (a) Cu-CoO (1:2), (b) Cu-CoO (1:4).

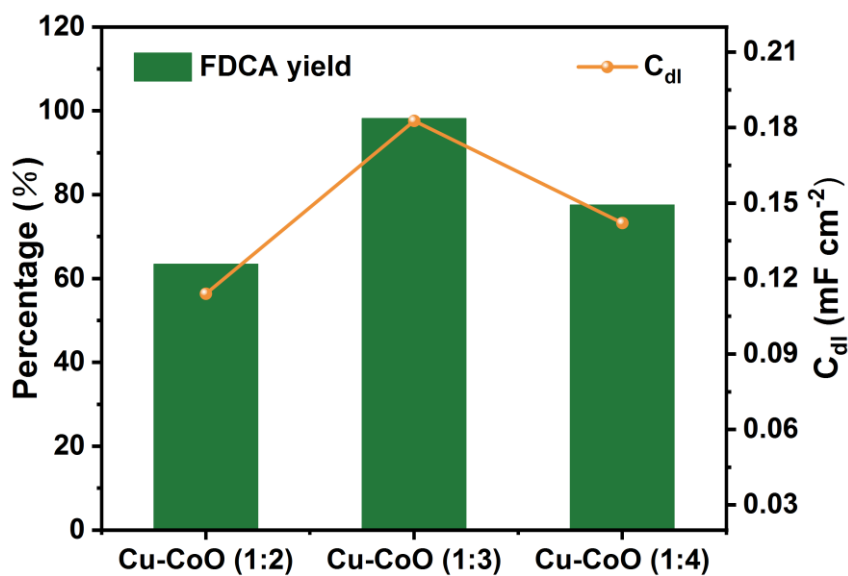

**Fig. S20** FDCA yield and  $C_{dl}$  of the Cu-CoO (1:2,1:3,1:4).

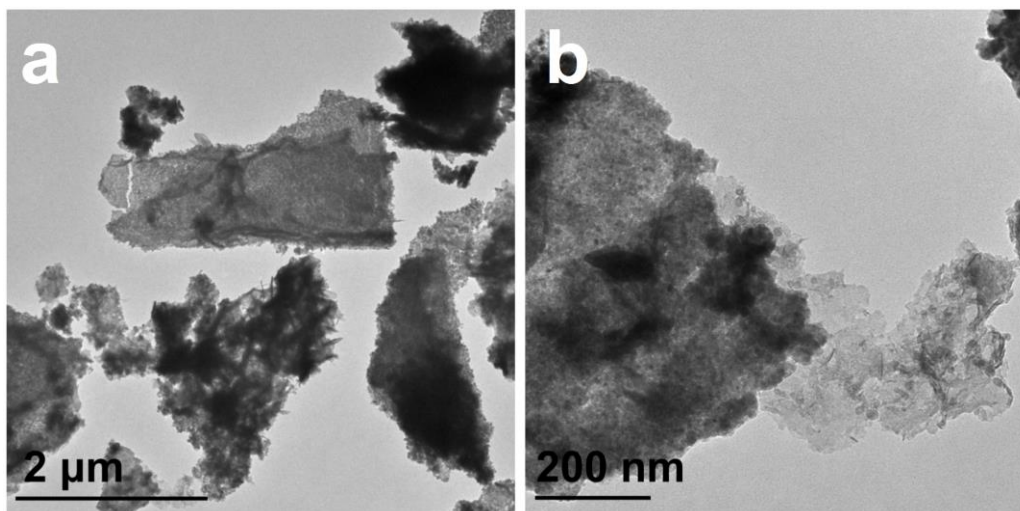

**Fig. S21** TEM images of Cu-CoO (1:3) after four electrolysis cycles.

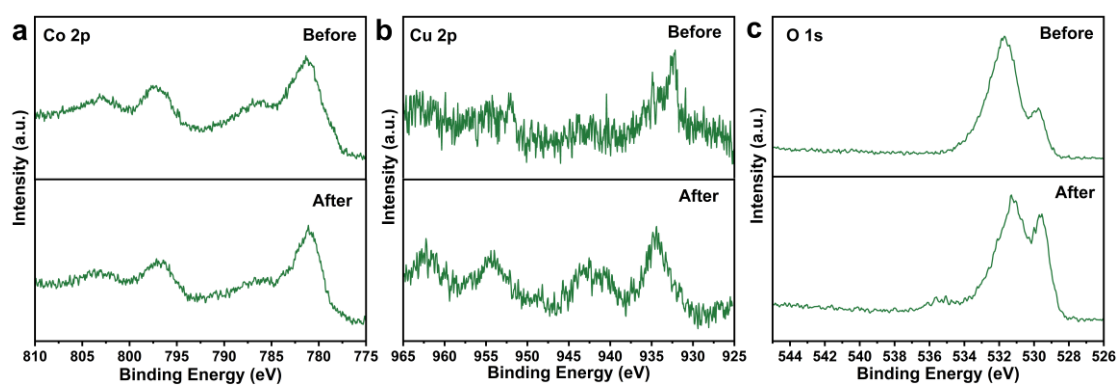

**Fig. S22** XPS spectra of (a) Co 2p, (b) Cu 2p, (c) O 1s of Cu-CoO (1:3) before and after four electrolysis cycles.

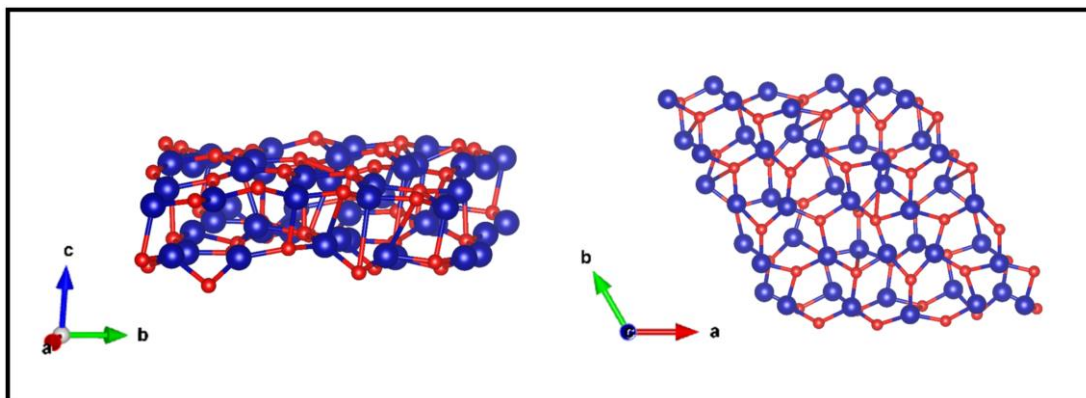

**Fig. S23** Side and top views of an optimized structure for the CoO

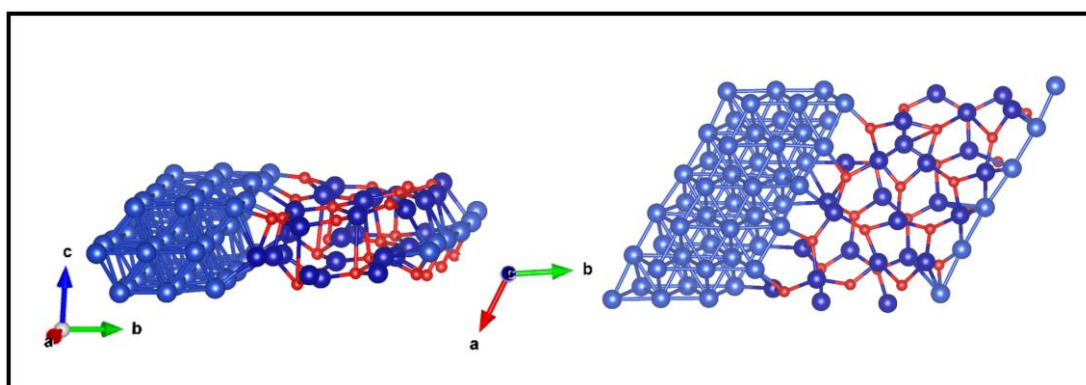

**Fig. S24** Side and top views of an optimized structure for the Cu-CoO (1:3).

**Table S1** Recently reported electrocatalysts for HMF conversion.

| Catalysts                                              | C <sub>HMF</sub><br>(mM) | Potential<br>(V vs.<br>RHE) | Conversion<br>(%) | FDCA<br>Yield<br>(%) | FE<br>(%) | Cycles<br>(FDCA<br>yield %) |
|--------------------------------------------------------|--------------------------|-----------------------------|-------------------|----------------------|-----------|-----------------------------|
| Cu-CoO (This work)                                     | 10                       | 1.45                        | 100               | 98.2                 | 98.1      | 4(>95)                      |
| nanocrystalline Cu <sup>8</sup>                        | 5                        | 1.62                        | 99.9              | 96.4                 | 95.3      | 5(97.5)                     |
| NiCoMn-LDHs <sup>9</sup>                               | 1                        | 1.50                        | 100               | 91.7                 | -         | 4(>85)                      |
| CuH_NWs@Ce:NiH_NSs/Cu <sup>10</sup>                    | 10                       | 1.45                        | 98.5              | 97.9                 | 98        | 15(>90)                     |
| Cu NPs <sup>11</sup>                                   | 10                       | 1.47                        | 98                | 94                   | -         | -                           |
| P-Co <sub>3</sub> O <sub>4</sub> -NBA@NF <sup>12</sup> | 10                       | 1.636                       | 100               | 96.9                 | 97.0      | 30(~90)                     |
| Co <sub>3</sub> O <sub>4</sub> -NiO-500 <sup>13</sup>  | 10                       | 1.45                        | 96.95             | 83.33                | 89.47     | 6(~90)                      |
| Co(OH) <sub>2</sub> @ZIF-67 <sup>14</sup>              | 10                       | 1.42                        | 90.9              | 81.8                 | 83.6      | 3(~80)                      |
| CuO-PdO <sup>15</sup>                                  | 50                       | -                           | 99.5              | 96.2                 | 93.7      | 6(~90)                      |
| CuCo <sub>2</sub> O <sub>4</sub> <sup>16</sup>         | 50                       | 1.45                        | -                 | 93.7                 | 94        | 6(~90)                      |
| N-NiMoO <sub>4</sub> <sup>17</sup>                     | 10                       | 1.473                       | 100               | 97                   | 91        | 6(~50)                      |
| VO-Sc <sub>2</sub> O <sub>3</sub> <sup>18</sup>        | 10                       | 1.46                        | -                 | <95                  | <90       | 11(~90)                     |
| NiCo <sub>2</sub> O <sub>4</sub> <sup>19</sup>         | 5                        | 1.5                         | 99.6              | 90.8                 | 87.5      | 3(>80)                      |
| CuNi(OH) <sub>2</sub> <sup>20</sup>                    | 5                        | 1.45                        | 100               | 93.3                 | 94.4      | 4(>70)                      |
| δ-MnO <sub>2</sub> <sup>21</sup>                       | 10                       | 1.457                       | -                 | 98                   | 98        | 5(~90)                      |

**Table S2** Adsorption energy of HMF on different surfaces

| <b>Adsorbed sites</b> | <b><math>E_{ad/sub}</math></b> | <b><math>E_{sub}</math></b> | <b><math>E_{ad}</math></b> |
|-----------------------|--------------------------------|-----------------------------|----------------------------|
| CoO                   | -526.4025649                   | -430.52549                  | -0.73492782                |
| Cu-CoO                | -573.2998491                   | -476.98893                  | -1.16877207                |

\*Where  $E_{ad/sub}$ ,  $E_{ad}$ , and  $E_{sub}$  are the total energies of the optimized adsorbate/substrate system, the adsorbate in the gas phase, and the clean substrate, respectively.



**Table S3** Bader charge analysis of Cu-CoO

| #  | X       | Y      | Z      | CHARGE  | MIN DIST | ATOMIC VOL |
|----|---------|--------|--------|---------|----------|------------|
| 1  | 0.4715  | 1.3230 | 0.6209 | 10.7538 | 0.8282   | 67.2936    |
| 2  | 1.7507  | 0.4036 | 2.6211 | 10.8649 | 0.8728   | 11.8312    |
| 3  | -0.7075 | 1.6140 | 4.7699 | 11.0028 | 1.0966   | 62.0794    |
| 4  | 2.9819  | 1.1610 | 0.5460 | 10.6633 | 0.8935   | 66.2919    |
| 5  | 4.2424  | 0.3299 | 2.5298 | 10.8148 | 0.8633   | 11.6879    |
| 6  | 1.791   | 1.6596 | 4.7064 | 11.0124 | 1.087    | 58.9094    |
| 7  | 5.5142  | 1.1423 | 0.4803 | 10.7147 | 0.9161   | 74.2694    |
| 8  | 6.7297  | 0.0861 | 2.5488 | 10.8188 | 0.8429   | 11.9081    |
| 9  | 4.2796  | 1.6473 | 4.6272 | 11.0137 | 1.0751   | 55.1293    |
| 10 | 8.0186  | 1.1628 | 0.5514 | 10.7572 | 0.8639   | 69.1569    |
| 11 | 9.2571  | 0.0782 | 2.7288 | 10.7860 | 0.8428   | 12.4325    |
| 12 | 6.7437  | 1.4855 | 4.6109 | 11.0196 | 1.0863   | 46.4833    |
| 13 | 10.5112 | 1.2439 | 0.6728 | 10.7788 | 0.8602   | 76.0974    |
| 14 | 11.8392 | 0.2262 | 2.7435 | 10.7798 | 0.9222   | 12.1675    |
| 15 | 9.2751  | 1.5264 | 4.7187 | 11.0074 | 1.0883   | 53.0963    |
| 16 | -0.7344 | 3.4464 | 0.7519 | 11.0002 | 1.0966   | 57.3248    |
| 17 | 0.5235  | 2.581  | 2.7759 | 10.9412 | 1.0661   | 11.3428    |
| 18 | -1.9345 | 3.8002 | 4.854  | 11.0039 | 1.0816   | 60.9857    |
| 19 | 1.7960  | 3.4757 | 0.7747 | 11.0164 | 1.0669   | 49.7910    |
| 20 | 3.0339  | 2.5564 | 2.6878 | 10.9572 | 1.0517   | 11.3316    |
| 21 | 0.5388  | 3.8321 | 4.9123 | 11.0108 | 1.1027   | 64.0724    |
| 22 | 4.2877  | 3.3884 | 0.6321 | 10.9976 | 1.1088   | 65.8243    |
| 23 | 5.5681  | 2.4484 | 2.6249 | 10.9328 | 1.0662   | 11.3027    |
| 24 | 3.0748  | 3.8395 | 4.8302 | 11.0003 | 1.0858   | 57.4009    |
| 25 | 6.7841  | 3.3445 | 0.6258 | 10.9958 | 1.1177   | 62.6399    |
| 26 | 8.0555  | 2.3694 | 2.677  | 10.9463 | 1.0826   | 11.5037    |
| 27 | 5.5600  | 3.8554 | 4.7451 | 11.0081 | 1.0698   | 53.5055    |
| 28 | 9.2933  | 3.3585 | 0.6771 | 10.9982 | 1.0943   | 59.7942    |
| 29 | 10.5472 | 2.4464 | 2.7806 | 10.9531 | 1.0750   | 11.4613    |
| 30 | 8.0466  | 3.7676 | 4.7623 | 11.0118 | 1.0821   | 61.4941    |
| 31 | -1.9331 | 5.6447 | 0.9852 | 10.9979 | 1.0374   | 67.7556    |

---

|    |         |         |        |         |        |          |
|----|---------|---------|--------|---------|--------|----------|
| 32 | -0.7077 | 4.7670  | 2.8697 | 10.9826 | 1.0186 | 12.0026  |
| 33 | -3.1242 | 5.9353  | 4.7889 | 10.7259 | 0.8638 | 52.9178  |
| 34 | 0.5753  | 5.6457  | 0.9851 | 11.0774 | 1.0646 | 57.5410  |
| 35 | 1.8355  | 4.9414  | 2.9350 | 10.8966 | 1.0301 | 12.3837  |
| 36 | -0.5919 | 6.0944  | 4.8173 | 10.7397 | 0.9043 | 52.9090  |
| 37 | 3.1026  | 5.6668  | 0.9380 | 11.0743 | 1.0441 | 61.0609  |
| 38 | 4.3483  | 4.6813  | 2.7529 | 10.9739 | 1.0144 | 11.8841  |
| 39 | 1.8144  | 5.9452  | 5.1323 | 10.9922 | 1.0519 | 143.5375 |
| 40 | 5.6267  | 5.6292  | 0.9187 | 11.0447 | 1.0467 | 57.7965  |
| 41 | 6.8437  | 4.6723  | 2.7649 | 10.9872 | 1.0193 | 11.7728  |
| 42 | 4.1767  | 6.1177  | 4.6131 | 10.7529 | 0.8786 | 46.5898  |
| 43 | 8.1046  | 5.5407  | 0.8741 | 11.0624 | 1.0662 | 73.7449  |
| 44 | 9.3135  | 4.6508  | 2.7992 | 10.9604 | 1.0467 | 12.5438  |
| 45 | 6.8039  | 6.0395  | 4.7165 | 10.7863 | 0.8870 | 72.0418  |
| 46 | -0.3997 | 7.4949  | 2.4246 | 8.3954  | 0.7663 | 13.1500  |
| 47 | -3.8018 | 9.0780  | 4.3325 | 8.1230  | 0.7461 | 22.6719  |
| 48 | 1.8524  | 7.6895  | 1.7439 | 8.6589  | 0.7934 | 16.1374  |
| 49 | -1.3704 | 8.9676  | 4.2912 | 8.1542  | 0.7985 | 20.2090  |
| 50 | 4.6093  | 7.7094  | 2.0982 | 8.4284  | 0.8067 | 13.4046  |
| 51 | 2.1600  | 8.2207  | 3.9914 | 8.1607  | 0.8010 | 16.9205  |
| 52 | 7.2301  | 7.3611  | 2.4615 | 8.3753  | 0.8311 | 13.7297  |
| 53 | 5.6858  | 9.1386  | 3.8694 | 8.0865  | 0.7716 | 16.7844  |
| 54 | -2.7573 | 9.7180  | 2.0133 | 8.0070  | 0.7952 | 17.2648  |
| 55 | -5.8285 | 11.8025 | 3.7828 | 7.9175  | 0.7742 | 12.0202  |
| 56 | 0.2083  | 10.0646 | 1.3429 | 7.9401  | 0.7578 | 40.8239  |
| 57 | -2.4694 | 11.2420 | 4.2065 | 7.9910  | 0.7637 | 17.6059  |
| 58 | 3.5052  | 9.9406  | 1.0211 | 7.9714  | 0.7427 | 57.5707  |
| 59 | 0.9263  | 11.3812 | 4.6004 | 8.0198  | 0.7607 | 41.2115  |
| 60 | 6.6071  | 9.9115  | 1.6723 | 8.0326  | 0.8169 | 21.3940  |
| 61 | 3.3374  | 11.5465 | 4.2458 | 8.1188  | 0.7858 | 18.8069  |
| 62 | -4.1201 | 12.8768 | 1.5942 | 7.9528  | 0.7958 | 22.5438  |
| 63 | -7.112  | 13.8035 | 4.4002 | 8.3361  | 0.7504 | 21.8184  |
| 64 | -0.9577 | 12.7834 | 1.6327 | 7.9535  | 0.7629 | 20.0641  |
| 65 | -3.5498 | 14.1869 | 4.4218 | 8.3774  | 0.7341 | 22.3349  |
| 66 | 2.3216  | 12.7933 | 2.1262 | 8.1051  | 0.7484 | 12.7008  |

---

---

|    |         |         |        |        |        |          |
|----|---------|---------|--------|--------|--------|----------|
| 67 | -0.9268 | 14.1108 | 4.5480 | 8.4189 | 0.7375 | 21.6334  |
| 68 | 4.9854  | 13.0308 | 1.7760 | 8.0502 | 0.8048 | 15.0476  |
| 69 | 2.0933  | 13.7248 | 4.5509 | 8.4228 | 0.7389 | 19.0992  |
| 70 | -2.6364 | 7.7590  | 4.8311 | 6.9687 | 0.7543 | 87.9806  |
| 71 | -4.3831 | 8.8117  | 1.5814 | 7.0071 | 0.7846 | 42.4197  |
| 72 | 0.2397  | 7.8817  | 4.2146 | 7.0018 | 0.8664 | 15.9572  |
| 73 | -1.1579 | 8.8653  | 1.3887 | 6.9966 | 0.7793 | 52.0754  |
| 74 | 4.0383  | 7.9600  | 3.9316 | 7.0048 | 0.8306 | 15.2390  |
| 75 | 1.8081  | 9.2577  | 0.8181 | 6.9388 | 0.7602 | 120.3803 |
| 76 | 7.0849  | 7.9661  | 4.3680 | 7.0342 | 0.7730 | 36.9501  |
| 77 | 5.0773  | 9.0687  | 0.8947 | 6.9390 | 0.7460 | 116.7475 |
| 78 | -4.2744 | 10.8459 | 4.3678 | 6.9580 | 0.7932 | 44.6089  |
| 79 | -5.8321 | 11.8529 | 1.7989 | 7.0887 | 0.9188 | 20.7094  |
| 80 | -0.7086 | 10.6362 | 4.3210 | 6.9272 | 0.7723 | 22.5030  |
| 81 | -2.6282 | 11.7162 | 2.0022 | 7.0848 | 0.8036 | 18.6740  |
| 82 | 2.1813  | 10.0970 | 4.3625 | 6.9304 | 0.7393 | 41.1178  |
| 83 | 0.5789  | 11.7728 | 1.7132 | 6.9990 | 0.7590 | 19.9608  |
| 84 | 5.0753  | 10.8252 | 4.2222 | 6.9909 | 0.7883 | 35.9348  |
| 85 | 3.6765  | 11.6771 | 1.4478 | 6.9865 | 0.7701 | 23.8242  |
| 86 | -5.3145 | 13.6206 | 4.5682 | 6.9498 | 0.7623 | 58.6868  |
| 87 | -7.3018 | 14.5766 | 0.8163 | 6.9532 | 0.8099 | 67.3168  |
| 88 | -2.2989 | 12.9716 | 4.8975 | 6.8756 | 0.7199 | 94.9684  |
| 89 | -4.3495 | 14.4926 | 0.7191 | 6.9826 | 0.8047 | 90.7623  |
| 90 | 0.4810  | 13.0878 | 5.0660 | 6.9019 | 0.7311 | 116.2263 |
| 91 | -1.3141 | 14.3373 | 0.7777 | 6.9658 | 0.7719 | 90.4596  |
| 92 | 3.7950  | 13.2155 | 5.0243 | 6.9379 | 0.7365 | 126.8244 |
| 93 | 1.9167  | 14.4016 | 1.3432 | 6.9635 | 0.7894 | 24.4527  |

---

**Table S4** Unit-cell and position parameters of CoO optimization model.

| <b>CoO</b>              |                |          |          |
|-------------------------|----------------|----------|----------|
|                         | a (Å)          | 12.05760 |          |
|                         | b (Å)          | 12.05760 |          |
|                         | c (Å)          | 23.69190 |          |
|                         | $\alpha$ (deg) | 90.0000  |          |
|                         | $\beta$ (deg)  | 90.0000  |          |
|                         | $\gamma$ (deg) | 120.0000 |          |
| <b>Atom Coordinates</b> | <b>x</b>       | <b>y</b> | <b>z</b> |
| Co1                     | 0.97231        | 0.01794  | 0.18637  |
| Co2                     | 0.19904        | 0.08491  | 0.09766  |
| Co3                     | 0.23987        | 0.00878  | 0.19308  |
| Co4                     | 0.41180        | 0.05548  | 0.09536  |
| Co5                     | 0.96786        | 0.22149  | 0.19680  |
| Co6                     | 0.16465        | 0.34675  | 0.07841  |
| Co7                     | 0.26326        | 0.25648  | 0.18521  |
| Co8                     | 0.41292        | 0.29016  | 0.09975  |
| Co9                     | 0.46921        | 0.9736   | 0.21527  |
| Co10                    | 0.71145        | 0.09508  | 0.08685  |
| Co11                    | 0.77352        | 0.02382  | 0.19741  |
| Co12                    | 0.91013        | 0.08145  | 0.09762  |
| Co13                    | 0.51995        | 0.26866  | 0.22299  |
| Co14                    | 0.66676        | 0.31803  | 0.12813  |
| Co15                    | 0.72011        | 0.27038  | 0.22604  |
| Co16                    | 0.94125        | 0.31726  | 0.09824  |
| Co17                    | 0.00820        | 0.51100  | 0.20457  |
| Co18                    | 0.16785        | 0.54012  | 0.10879  |
| Co19                    | 0.21372        | 0.49774  | 0.20588  |
| Co20                    | 0.46574        | 0.59911  | 0.08902  |
| Co21                    | 0.98213        | 0.75418  | 0.20301  |
| Co22                    | 0.21139        | 0.84417  | 0.09625  |
| Co23                    | 0.25808        | 0.77301  | 0.19836  |

---

|      |         |         |         |
|------|---------|---------|---------|
| Co24 | 0.42069 | 0.85227 | 0.11519 |
| Co25 | 0.49535 | 0.52529 | 0.19041 |
| Co26 | 0.67596 | 0.60549 | 0.10816 |
| Co27 | 0.72171 | 0.47973 | 0.21392 |
| Co28 | 0.92418 | 0.60429 | 0.11834 |
| Co29 | 0.47323 | 0.77883 | 0.21020 |
| Co30 | 0.66213 | 0.79902 | 0.07711 |
| Co31 | 0.71710 | 0.71785 | 0.20072 |
| Co32 | 0.94045 | 0.81856 | 0.10300 |
| O1   | 0.01519 | 0.00120 | 0.09926 |
| O2   | 0.09460 | 0.18211 | 0.20500 |
| O3   | 0.25666 | 0.99312 | 0.05909 |
| O4   | 0.34390 | 0.17664 | 0.21892 |
| O5   | 0.00671 | 0.23250 | 0.05667 |
| O6   | 0.05068 | 0.38620 | 0.22359 |
| O7   | 0.24748 | 0.25895 | 0.10024 |
| O8   | 0.31842 | 0.42910 | 0.20179 |
| O9   | 0.54080 | 0.01467 | 0.09532 |
| O10  | 0.55610 | 0.14161 | 0.23582 |
| O11  | 0.74974 | 0.97352 | 0.06732 |
| O12  | 0.80600 | 0.18430 | 0.21565 |
| O13  | 0.51982 | 0.23125 | 0.08665 |
| O14  | 0.55222 | 0.43075 | 0.23025 |
| O15  | 0.76869 | 0.26331 | 0.09193 |
| O16  | 0.84359 | 0.43433 | 0.23409 |
| O17  | 0.99517 | 0.49383 | 0.11824 |
| O18  | 0.08439 | 0.68446 | 0.21983 |
| O19  | 0.29004 | 0.51237 | 0.07868 |
| O20  | 0.31084 | 0.66177 | 0.22644 |
| O21  | 0.03891 | 0.74811 | 0.08234 |
| O22  | 0.06372 | 0.93135 | 0.20757 |
| O23  | 0.24861 | 0.71772 | 0.11941 |
| O24  | 0.30551 | 0.92310 | 0.23390 |
| O25  | 0.50086 | 0.46953 | 0.10014 |

---

---

|     |         |         |         |
|-----|---------|---------|---------|
| O26 | 0.55615 | 0.68749 | 0.21849 |
| O27 | 0.75007 | 0.49850 | 0.12367 |
| O28 | 0.81598 | 0.65735 | 0.23018 |
| O29 | 0.49939 | 0.76325 | 0.08820 |
| O30 | 0.60238 | 0.94174 | 0.21077 |
| O31 | 0.78065 | 0.75302 | 0.06917 |
| O32 | 0.80474 | 0.89193 | 0.19923 |

---

**Table S5** Unit-cell and position parameters of Cu-CoO (1:3) optimization model.

| <b>Cu-CoO (1:3)</b>     |                |          |          |
|-------------------------|----------------|----------|----------|
|                         | a (Å)          | 12.50950 |          |
|                         | b (Å)          | 17.30000 |          |
|                         | c (Å)          | 21.26140 |          |
|                         | $\alpha$ (deg) | 90.0000  |          |
|                         | $\beta$ (deg)  | 90.0000  |          |
|                         | $\gamma$ (deg) | 120.0000 |          |
| <b>Atom Coordinates</b> | <b>x</b>       | <b>y</b> | <b>z</b> |
| Cu1                     | 0.09875        | 0.08830  | 0.02920  |
| Cu2                     | 0.15858        | 0.02694  | 0.12328  |
| Cu3                     | 0.01793        | 0.10773  | 0.22435  |
| Cu4                     | 0.29195        | 0.07749  | 0.02568  |
| Cu5                     | 0.35436        | 0.02202  | 0.11899  |
| Cu6                     | 0.21976        | 0.11077  | 0.22136  |
| Cu7                     | 0.49352        | 0.07624  | 0.02259  |
| Cu8                     | 0.54194        | 0.00574  | 0.11988  |
| Cu9                     | 0.41813        | 0.10995  | 0.21764  |
| Cu10                    | 0.69466        | 0.07761  | 0.02593  |
| Cu11                    | 0.74361        | 0.00522  | 0.12835  |
| Cu12                    | 0.60765        | 0.09915  | 0.21687  |
| Cu13                    | 0.89767        | 0.08303  | 0.03164  |
| Cu14                    | 0.95685        | 0.01510  | 0.12904  |
| Cu15                    | 0.81189        | 0.10188  | 0.22194  |
| Cu16                    | 0.10036        | 0.23004  | 0.03536  |
| Cu17                    | 0.16097        | 0.17227  | 0.13056  |
| Cu18                    | 0.02075        | 0.25365  | 0.22830  |
| Cu19                    | 0.30398        | 0.23199  | 0.03644  |
| Cu20                    | 0.36051        | 0.17063  | 0.12642  |
| Cu21                    | 0.21993        | 0.25577  | 0.23104  |
| Cu22                    | 0.49914        | 0.22616  | 0.02973  |
| Cu23                    | 0.55811        | 0.16342  | 0.12346  |
| Cu24                    | 0.42300        | 0.25627  | 0.22718  |

---

|      |         |         |         |
|------|---------|---------|---------|
| Cu25 | 0.69668 | 0.22323 | 0.02943 |
| Cu26 | 0.75330 | 0.15815 | 0.12591 |
| Cu27 | 0.62240 | 0.25733 | 0.22318 |
| Cu28 | 0.89790 | 0.22416 | 0.03185 |
| Cu29 | 0.95604 | 0.16328 | 0.13078 |
| Cu30 | 0.81713 | 0.25147 | 0.22399 |
| Cu31 | 0.10599 | 0.37676 | 0.04634 |
| Cu32 | 0.16344 | 0.31818 | 0.13497 |
| Cu33 | 0.02418 | 0.39615 | 0.22524 |
| Cu34 | 0.30655 | 0.37683 | 0.04633 |
| Cu35 | 0.37479 | 0.32982 | 0.13804 |
| Cu36 | 0.23396 | 0.40678 | 0.22658 |
| Cu37 | 0.50956 | 0.37824 | 0.04412 |
| Cu38 | 0.56366 | 0.31246 | 0.12948 |
| Cu39 | 0.41943 | 0.39681 | 0.24139 |
| Cu40 | 0.70960 | 0.37573 | 0.04321 |
| Cu41 | 0.76272 | 0.31185 | 0.13004 |
| Cu42 | 0.61624 | 0.40833 | 0.21697 |
| Cu43 | 0.90359 | 0.36981 | 0.04111 |
| Cu44 | 0.95916 | 0.31042 | 0.13166 |
| Cu45 | 0.82264 | 0.40311 | 0.22183 |
| Co1  | 0.31396 | 0.50025 | 0.11404 |
| Co2  | 0.11507 | 0.60592 | 0.20377 |
| Co3  | 0.50297 | 0.51324 | 0.08202 |
| Co4  | 0.30433 | 0.59855 | 0.20183 |
| Co5  | 0.72428 | 0.51457 | 0.09869 |
| Co6  | 0.55208 | 0.54870 | 0.18773 |
| Co7  | 0.91771 | 0.49132 | 0.11577 |
| Co8  | 0.87629 | 0.60996 | 0.18199 |
| Co9  | 0.22810 | 0.64863 | 0.09469 |
| Co10 | 0.07879 | 0.78777 | 0.17792 |
| Co11 | 0.48117 | 0.67177 | 0.06316 |
| Co12 | 0.32145 | 0.75036 | 0.19785 |
| Co13 | 0.73899 | 0.66349 | 0.04802 |
| Co14 | 0.59933 | 0.75965 | 0.21637 |

---



---

|      |         |         |         |
|------|---------|---------|---------|
| Co15 | 0.98561 | 0.66155 | 0.07865 |
| Co16 | 0.79970 | 0.77068 | 0.19970 |
| Co17 | 0.26495 | 0.85947 | 0.07498 |
| Co18 | 0.06854 | 0.92132 | 0.20696 |
| Co19 | 0.51343 | 0.85324 | 0.07679 |
| Co20 | 0.37100 | 0.94691 | 0.20797 |
| Co21 | 0.77604 | 0.85390 | 0.10000 |
| Co22 | 0.57717 | 0.94183 | 0.21391 |
| Co23 | 0.99993 | 0.86975 | 0.08353 |
| Co24 | 0.80078 | 0.91607 | 0.21404 |
| O1   | 0.14735 | 0.51788 | 0.22723 |
| O2   | 0.05631 | 0.58814 | 0.07438 |
| O3   | 0.38292 | 0.52607 | 0.19823 |
| O4   | 0.31660 | 0.59172 | 0.06531 |
| O5   | 0.69019 | 0.53130 | 0.18492 |
| O6   | 0.57181 | 0.61791 | 0.03848 |
| O7   | 0.93402 | 0.53171 | 0.20544 |
| O8   | 0.82442 | 0.60530 | 0.04208 |
| O9   | 0.15888 | 0.72391 | 0.20543 |
| O10  | 0.08083 | 0.79113 | 0.08461 |
| O11  | 0.43425 | 0.70992 | 0.20323 |
| O12  | 0.33064 | 0.78201 | 0.09417 |
| O13  | 0.64037 | 0.67393 | 0.20518 |
| O14  | 0.58962 | 0.78578 | 0.08058 |
| O15  | 0.90533 | 0.72254 | 0.19859 |
| O16  | 0.83283 | 0.77939 | 0.06810 |
| O17  | 0.20379 | 0.90911 | 0.21486 |
| O18  | 0.08905 | 0.97292 | 0.03839 |
| O19  | 0.41490 | 0.86580 | 0.23035 |
| O20  | 0.32118 | 0.96732 | 0.03382 |
| O21  | 0.64249 | 0.87356 | 0.23827 |
| O22  | 0.55666 | 0.95695 | 0.03658 |
| O23  | 0.91331 | 0.88208 | 0.23631 |
| O24  | 0.81790 | 0.96125 | 0.06317 |

---

**Table S6** Unit-cell and position parameters of the optimized model for the adsorption of HMF on CoO

| <b>HMF@CoO</b>          |          |          |          |
|-------------------------|----------|----------|----------|
| a (Å)                   | 12.05760 |          |          |
| b (Å)                   | 12.05760 |          |          |
| c (Å)                   | 23.69190 |          |          |
| $\alpha$ (deg)          | 90.0000  |          |          |
| $\beta$ (deg)           | 90.0000  |          |          |
| $\gamma$ (deg)          | 120.0000 |          |          |
| <b>Atom Coordinates</b> | <b>x</b> | <b>y</b> | <b>z</b> |
| Co1                     | 0.97231  | 0.01794  | 0.18637  |
| Co2                     | 0.19904  | 0.08491  | 0.09766  |
| Co3                     | 0.23987  | 0.00878  | 0.19308  |
| Co4                     | 0.41180  | 0.05547  | 0.09536  |
| Co5                     | 0.96786  | 0.22149  | 0.19680  |
| Co6                     | 0.16465  | 0.34675  | 0.07841  |
| Co7                     | 0.26326  | 0.25647  | 0.18521  |
| Co8                     | 0.41292  | 0.29016  | 0.09975  |
| Co9                     | 0.46921  | 0.97360  | 0.21527  |
| Co10                    | 0.71146  | 0.09508  | 0.08685  |
| Co11                    | 0.77352  | 0.02382  | 0.19741  |
| Co12                    | 0.91013  | 0.08145  | 0.09762  |
| Co13                    | 0.51995  | 0.26866  | 0.22299  |
| Co14                    | 0.66676  | 0.31803  | 0.12813  |
| Co15                    | 0.72011  | 0.27037  | 0.22604  |
| Co16                    | 0.94125  | 0.31726  | 0.09824  |
| Co17                    | 0.00820  | 0.51100  | 0.20457  |
| Co18                    | 0.16785  | 0.54012  | 0.10879  |
| Co19                    | 0.21372  | 0.49774  | 0.20588  |
| Co20                    | 0.46574  | 0.59911  | 0.08902  |
| Co21                    | 0.98213  | 0.75418  | 0.20301  |
| Co22                    | 0.21139  | 0.84417  | 0.09625  |

---

|      |         |         |         |
|------|---------|---------|---------|
| Co23 | 0.25808 | 0.77301 | 0.19836 |
| Co24 | 0.42069 | 0.85226 | 0.11519 |
| Co25 | 0.49535 | 0.52529 | 0.19041 |
| Co26 | 0.67596 | 0.60549 | 0.10816 |
| Co27 | 0.72171 | 0.47973 | 0.21392 |
| Co28 | 0.92418 | 0.60429 | 0.11834 |
| Co29 | 0.47323 | 0.77883 | 0.21020 |
| Co30 | 0.66213 | 0.79902 | 0.07711 |
| Co31 | 0.71710 | 0.71785 | 0.20072 |
| Co32 | 0.94045 | 0.81856 | 0.10300 |
| O1   | 0.01519 | 0.00120 | 0.09926 |
| O2   | 0.09460 | 0.18211 | 0.20500 |
| O3   | 0.25666 | 0.99312 | 0.05909 |
| O4   | 0.34390 | 0.17664 | 0.21892 |
| O5   | 0.00671 | 0.23250 | 0.05667 |
| O6   | 0.05068 | 0.38620 | 0.22359 |
| O7   | 0.24748 | 0.25895 | 0.10023 |
| O8   | 0.31842 | 0.42910 | 0.20180 |
| O9   | 0.54080 | 0.01467 | 0.09532 |
| O10  | 0.55610 | 0.14161 | 0.23582 |
| O11  | 0.74974 | 0.97352 | 0.06732 |
| O12  | 0.80600 | 0.18430 | 0.21565 |
| O13  | 0.51982 | 0.23125 | 0.08665 |
| O14  | 0.55222 | 0.43075 | 0.23025 |
| O15  | 0.76869 | 0.26331 | 0.09193 |
| O16  | 0.84359 | 0.43433 | 0.23409 |
| O17  | 0.99517 | 0.49383 | 0.11824 |
| O18  | 0.08439 | 0.68446 | 0.21983 |
| O19  | 0.29004 | 0.51237 | 0.07868 |
| O20  | 0.31084 | 0.66177 | 0.22644 |
| O21  | 0.03891 | 0.74811 | 0.08234 |
| O22  | 0.06372 | 0.93135 | 0.20757 |
| O23  | 0.24861 | 0.71772 | 0.11941 |
| O24  | 0.30551 | 0.92310 | 0.23390 |
| O25  | 0.50086 | 0.46953 | 0.10014 |

---

---

|     |         |         |         |
|-----|---------|---------|---------|
| O26 | 0.55615 | 0.68749 | 0.21849 |
| O27 | 0.75007 | 0.49850 | 0.12367 |
| O28 | 0.81598 | 0.65735 | 0.23018 |
| O29 | 0.49939 | 0.76325 | 0.08820 |
| O30 | 0.60238 | 0.94174 | 0.21077 |
| O31 | 0.78065 | 0.75302 | 0.06917 |
| O32 | 0.80474 | 0.89193 | 0.19923 |
| O33 | 0.54723 | 0.61036 | 0.35021 |
| O34 | 0.47936 | 0.80254 | 0.32919 |
| O35 | 0.64881 | 0.37191 | 0.35880 |
| C1  | 0.42272 | 0.58694 | 0.34966 |
| C2  | 0.33946 | 0.45697 | 0.35641 |
| C3  | 0.41547 | 0.39814 | 0.36127 |
| C4  | 0.54108 | 0.49557 | 0.35761 |
| C5  | 0.66574 | 0.49729 | 0.36052 |
| C6  | 0.39821 | 0.69074 | 0.34073 |
| H1  | 0.23550 | 0.41048 | 0.35662 |
| H2  | 0.38405 | 0.29730 | 0.36665 |
| H3  | 0.73031 | 0.56062 | 0.32692 |
| H4  | 0.29450 | 0.66029 | 0.34375 |
| H5  | 0.71392 | 0.53921 | 0.40093 |
| H6  | 0.61611 | 0.33535 | 0.32138 |

---

**Table S7** Unit-cell and position parameters of the optimized model for the adsorption of HMF on Cu-CoO (1:3)

| <b>HMF@Cu-CoO (1:3)</b> |          |          |          |
|-------------------------|----------|----------|----------|
| a (Å)                   | 12.50950 |          |          |
| b (Å)                   | 17.30000 |          |          |
| c (Å)                   | 21.26140 |          |          |
| $\alpha$ (deg)          | 90.0000  |          |          |
| $\beta$ (deg)           | 90.0000  |          |          |
| $\gamma$ (deg)          | 120.0000 |          |          |
| <b>Atom Coordinates</b> | <b>x</b> | <b>y</b> | <b>z</b> |
| Cu1                     | 0.09875  | 0.08830  | 0.02920  |
| Cu2                     | 0.15858  | 0.02694  | 0.12328  |
| Cu3                     | 0.01793  | 0.10773  | 0.22435  |
| Cu4                     | 0.29195  | 0.07749  | 0.02568  |
| Cu5                     | 0.35436  | 0.02202  | 0.11899  |
| Cu6                     | 0.21977  | 0.11077  | 0.22136  |
| Cu7                     | 0.49352  | 0.07624  | 0.02259  |
| Cu8                     | 0.54194  | 0.00574  | 0.11988  |
| Cu9                     | 0.41813  | 0.10995  | 0.21763  |
| Cu10                    | 0.69466  | 0.07761  | 0.02593  |
| Cu11                    | 0.74361  | 0.00522  | 0.12835  |
| Cu12                    | 0.60765  | 0.09915  | 0.21686  |
| Cu13                    | 0.89767  | 0.08303  | 0.03164  |
| Cu14                    | 0.95685  | 0.01509  | 0.12904  |
| Cu15                    | 0.81189  | 0.10188  | 0.22194  |
| Cu16                    | 0.10036  | 0.23003  | 0.03536  |
| Cu17                    | 0.16097  | 0.17227  | 0.13056  |
| Cu18                    | 0.02075  | 0.25365  | 0.22830  |
| Cu19                    | 0.30398  | 0.23199  | 0.03644  |
| Cu20                    | 0.36051  | 0.17063  | 0.12642  |
| Cu21                    | 0.21993  | 0.25577  | 0.23104  |
| Cu22                    | 0.49914  | 0.22616  | 0.02973  |

---

|      |         |         |         |
|------|---------|---------|---------|
| Cu23 | 0.55811 | 0.16342 | 0.12346 |
| Cu24 | 0.42300 | 0.25627 | 0.22718 |
| Cu25 | 0.69667 | 0.22323 | 0.02943 |
| Cu26 | 0.75330 | 0.15815 | 0.12591 |
| Cu27 | 0.62240 | 0.25733 | 0.22318 |
| Cu28 | 0.89790 | 0.22416 | 0.03185 |
| Cu29 | 0.95604 | 0.16328 | 0.13078 |
| Cu30 | 0.81713 | 0.25147 | 0.22399 |
| Cu31 | 0.10599 | 0.37676 | 0.04634 |
| Cu32 | 0.16344 | 0.31818 | 0.13497 |
| Cu33 | 0.02418 | 0.39615 | 0.22524 |
| Cu34 | 0.30655 | 0.37683 | 0.04633 |
| Cu35 | 0.37479 | 0.32982 | 0.13804 |
| Cu36 | 0.23396 | 0.40678 | 0.22657 |
| Cu37 | 0.50956 | 0.37824 | 0.04412 |
| Cu38 | 0.56366 | 0.31246 | 0.12948 |
| Cu39 | 0.41942 | 0.39681 | 0.24139 |
| Cu40 | 0.70960 | 0.37573 | 0.04321 |
| Cu41 | 0.76272 | 0.31185 | 0.13004 |
| Cu42 | 0.61624 | 0.40833 | 0.21697 |
| Cu43 | 0.90359 | 0.36981 | 0.04111 |
| Cu44 | 0.95916 | 0.31042 | 0.13166 |
| Cu45 | 0.82264 | 0.40311 | 0.22183 |
| Co1  | 0.31396 | 0.50025 | 0.11404 |
| Co2  | 0.11507 | 0.60592 | 0.20377 |
| Co3  | 0.50297 | 0.51324 | 0.08202 |
| Co4  | 0.30433 | 0.59855 | 0.20183 |
| Co5  | 0.72428 | 0.51457 | 0.09869 |
| Co6  | 0.55208 | 0.54870 | 0.18773 |
| Co7  | 0.91771 | 0.49132 | 0.11577 |
| Co8  | 0.87629 | 0.60996 | 0.18199 |
| Co9  | 0.22810 | 0.64863 | 0.09469 |
| Co10 | 0.07879 | 0.78776 | 0.17792 |
| Co11 | 0.48117 | 0.67177 | 0.06316 |
| Co12 | 0.32145 | 0.75036 | 0.19785 |

---

---

|      |         |         |         |
|------|---------|---------|---------|
| Co13 | 0.73899 | 0.66349 | 0.04802 |
| Co14 | 0.59933 | 0.75965 | 0.21637 |
| Co15 | 0.98561 | 0.66155 | 0.07865 |
| Co16 | 0.79970 | 0.77068 | 0.19969 |
| Co17 | 0.26495 | 0.85947 | 0.07498 |
| Co18 | 0.06854 | 0.92132 | 0.20695 |
| Co19 | 0.51343 | 0.85323 | 0.07679 |
| Co20 | 0.37100 | 0.94691 | 0.20797 |
| Co21 | 0.77604 | 0.85390 | 0.10000 |
| Co22 | 0.57717 | 0.94184 | 0.21391 |
| Co23 | 0.99994 | 0.86975 | 0.08353 |
| Co24 | 0.80078 | 0.91607 | 0.21404 |
| O1   | 0.14735 | 0.51788 | 0.22723 |
| O2   | 0.05631 | 0.58814 | 0.07438 |
| O3   | 0.38292 | 0.52607 | 0.19823 |
| O4   | 0.31660 | 0.59172 | 0.06531 |
| O5   | 0.69019 | 0.53130 | 0.18492 |
| O6   | 0.57181 | 0.61791 | 0.03848 |
| O7   | 0.93402 | 0.53170 | 0.20544 |
| O8   | 0.82442 | 0.60530 | 0.04208 |
| O9   | 0.15888 | 0.72391 | 0.20543 |
| O10  | 0.08083 | 0.79113 | 0.08461 |
| O11  | 0.43425 | 0.70992 | 0.20323 |
| O12  | 0.33064 | 0.78200 | 0.09417 |
| O13  | 0.64037 | 0.67393 | 0.20518 |
| O14  | 0.58962 | 0.78578 | 0.08058 |
| O15  | 0.90533 | 0.72254 | 0.19859 |
| O16  | 0.83283 | 0.77939 | 0.06810 |
| O17  | 0.20379 | 0.90911 | 0.21486 |
| O18  | 0.08905 | 0.97292 | 0.03839 |
| O19  | 0.41490 | 0.86580 | 0.23035 |
| O20  | 0.32118 | 0.96732 | 0.03382 |
| O21  | 0.64250 | 0.87355 | 0.23827 |
| O22  | 0.55666 | 0.95695 | 0.03658 |
| O23  | 0.91331 | 0.88208 | 0.23631 |

---

---

|     |         |         |         |
|-----|---------|---------|---------|
| O24 | 0.81790 | 0.96125 | 0.06317 |
| O25 | 0.46338 | 0.54593 | 0.35120 |
| O26 | 0.33677 | 0.64538 | 0.35587 |
| O27 | 0.63407 | 0.42554 | 0.36380 |
| C1  | 0.33633 | 0.50743 | 0.35313 |
| C2  | 0.28244 | 0.41551 | 0.35263 |
| C3  | 0.38142 | 0.39612 | 0.35108 |
| C4  | 0.48979 | 0.47831 | 0.35058 |
| C5  | 0.62243 | 0.50243 | 0.35595 |
| C6  | 0.28014 | 0.56339 | 0.35576 |
| H1  | 0.18438 | 0.36756 | 0.35634 |
| H2  | 0.37542 | 0.33181 | 0.35763 |
| H3  | 0.67490 | 0.54348 | 0.31503 |
| H4  | 0.17719 | 0.52344 | 0.35749 |
| H5  | 0.66203 | 0.54391 | 0.39827 |
| H6  | 0.61731 | 0.39344 | 0.32325 |

---



## References

- 1 A. P. Abbott, D. Boothby, G. Capper, D. L. Davies and R. K. Rasheed, *J. Am. Chem. Soc.*, 2004, **126**, 9142-9147.
- 2 G. Kresse and J. Hafner, *Phys. Rev. B*, 1992, **47**, 558-561.
- 3 G. Kresse and J. Hafner, *Phys. Rev. B*, 1994, **49**, 14251-14269.
- 4 J. P. Perdew, K. Burke and M. Ernzerhof, *Phys. Rev. Lett.*, 1996, **77**, 3865-3868.
- 5 G. Kresse and D. Joubert, *Phys. Rev. B*, 1999, **59**, 1758-1775.
- 6 P. E. Blöchl, *Phys. Rev. B*, 1994, **50**, 17953-17979.
- 7 S. Grimme, J. Antony, S. Ehrlich and H. Krieg, *J. Chem. Phys.*, 2010, **132**, 154104.
- 8 D.-H. Nam, B. J. Taitt and K.-S. Choi, *ACS Catal.*, 2018, **8**, 1197-1206.
- 9 B. Liu, S. Xu, M. Zhang, X. Li, D. Decarolis, Y. Liu, Y. Wang, E. K. Gibson, C. R. A. Catlow and K. Yan, *Green Chem.*, 2021, **23**, 4034-4043.
- 10 G. Ren, B. Liu, L. Liu, M. Hu, J. Zhu, X. Xu, P. Jing, J. Wu and J. Zhang, *Inorg. Chem.*, 2023, **62**, 12534-12547.
- 11 Y. Zhou, *Appl. Catal. B-Environ.*, 2022, **317**, 121776.
- 12 D. Liu, Y. Li, C. Wang, H. Yang, R. Wang, S. Li and X. Yang, *Appl. Catal. A-Gen.*, 2024, **669**, 119497.
- 13 P. Jin, L. Zhang, Z. Wu, B. Zhou and Z. Duan, *Chem. Eng. J.*, 2024, **481**, 148303.
- 14 T. Pila, K. Nueangnoraj, S. Kettrat, V. Somjit and K. Kongpatpanich, *ACS Appl. Energy Mater.*, 2021, **4**, 12909-12916.
- 15 P. Zhou, X. Lv, S. Tao, J. Wu, H. Wang, X. Wei, T. Wang, B. Zhou, Y. Lu, T. Frauenheim, X. Fu, S. Wang and Y. Zou, *Adv. Mater.*, 2022, **34**, 2204089.

- 16 Y. Lu, C. Dong, Y. Huang, Y. Zou, Z. Liu, Y. Liu, Y. Li, N. He, J. Shi and S. Wang, *Angew. Chem. Int. Ed.*, 2020, **59**, 19215-19221.
- 17 W. Wang and M. Wang, *Catal. Sci. Technol.*, 2021, **11**, 7326-7330.
- 18 Y. Wu, L. Ma, J. Wu, M. Song, C. Wang and J. Lu, *Adv. Mater.*, 2024, 2311698.
- 19 M. J. Kang, H. Park, J. Jegal, S. Y. Hwang, Y. S. Kang and H. G. Cha, *Appl. Catal. B*, 2019, **242**, 85-91.
- 20 H. Chen, J. Wang, Y. Yao, Z. Zhang, Z. Yang, J. Li, K. Chen, X. Lu, P. Ouyang and J. Fu, *Chemelectrochem*, 2019, **6**, 5797-5801.
- 21 C. Wang, H.-J. Bongard, C. Weidenthaler, Y. Wu and F. Schüth, *Chem. Mater.*, 2022, **34**, 3123-3132.
